# Supplementary material
Source: publisher figshare collection journal article supplement (https://aacr.figshare.com/articles/dataset/_/22758776)
Supplement: Supplementary file 1 [file 40438160]

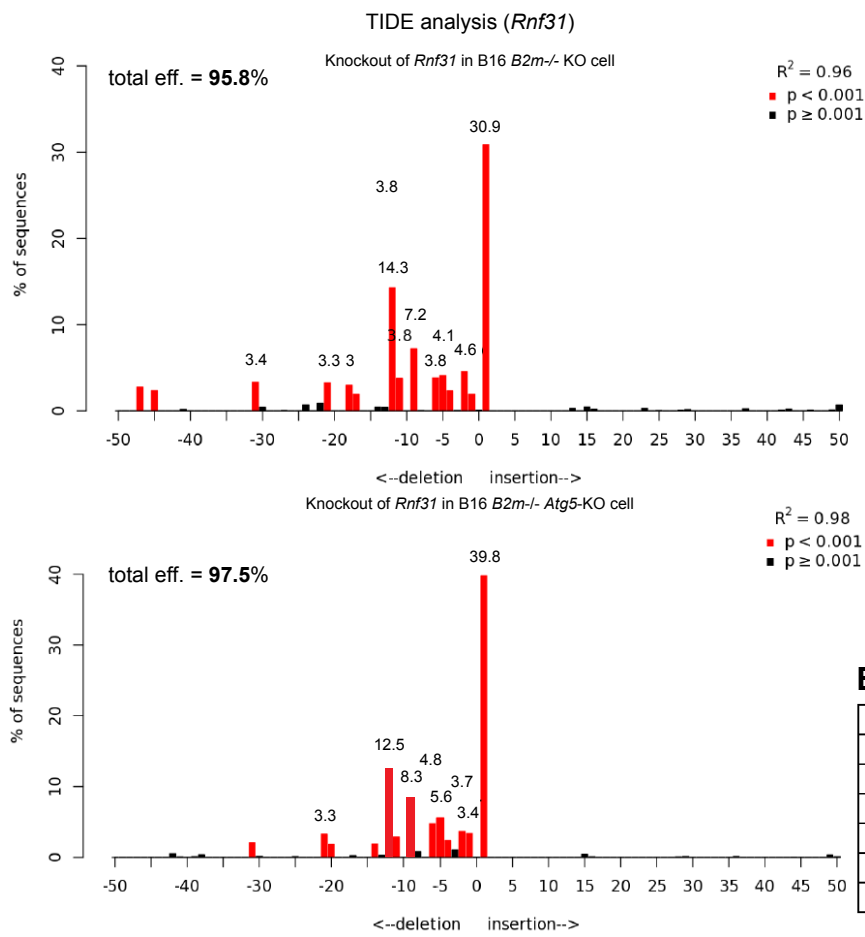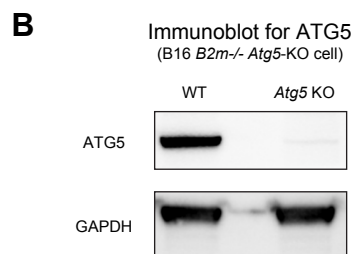

**C** TIDE analysis of control gRNA

|                                       | Editing efficiency |
|---------------------------------------|--------------------|
| B16 <i>B2m</i> <sup>-/-</sup> ctrl KO | 95.2%              |

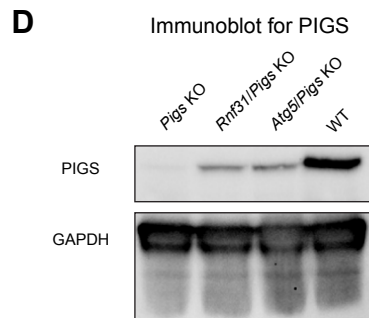

**E** TIDE analysis of *Rnf31*

|                                                                  | Editing efficiency |
|------------------------------------------------------------------|--------------------|
| B16 <i>B2m</i> <sup>-/-</sup> <i>Rnf31</i> -KO                   | 95.8%              |
| B16 <i>B2m</i> <sup>-/-</sup> <i>Rnf31</i> / <i>Atg5</i> -dKO    | 97.5%              |
| B16 <i>Rnf31</i> -KO                                             | 96.8%              |
| B16 <i>Rnf31</i> / <i>Atg5</i> -dKO                              | 96.4%              |
| PY8119 <i>B2m</i> <sup>-/-</sup> <i>Rnf31</i> / <i>Atg5</i> -dKO | 94.3%              |
| MC38 <i>B2m</i> <sup>-/-</sup> <i>Rnf31</i> / <i>Atg5</i> -dKO   | 91.3%              |

TIDE analysis of *RNF31*

|                                      | Editing efficiency |
|--------------------------------------|--------------------|
| A375 <i>RNF31</i> -KO                | 90.7%              |
| A375 <i>RNF31</i> / <i>ATG5</i> -dKO | 92.0%              |

TIDE analysis of *ATG5*

|                                      | Editing efficiency |
|--------------------------------------|--------------------|
| A375 <i>ATG5</i> -KO                 | 86.3%              |
| A375 <i>RNF31</i> / <i>ATG5</i> -dKO | 87.8%              |

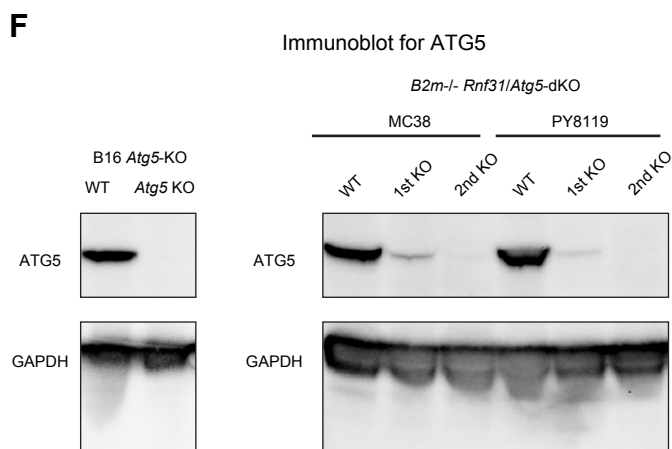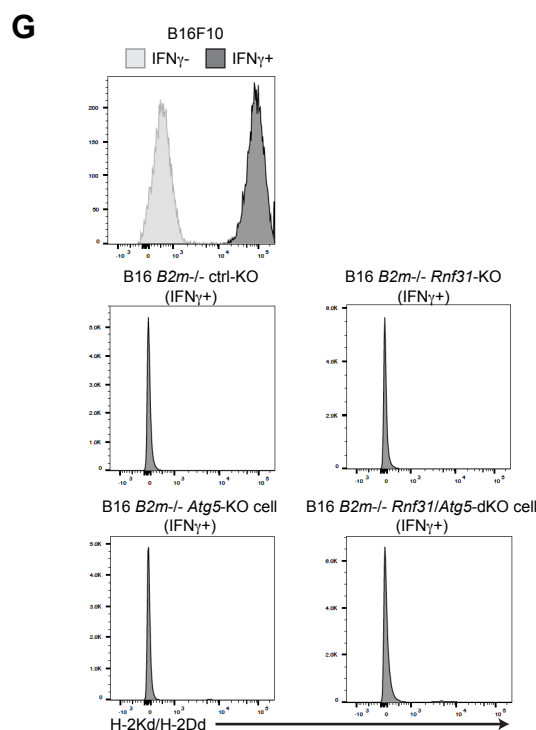

**H** Editing efficiency of *Ifngr1* and *Tnfrsf1a*  
(B16 *B2m*<sup>-/-</sup> *Rnf31*/*Atg5*-dKO cell)

|                                    | Genes         |                 |
|------------------------------------|---------------|-----------------|
|                                    | <i>Ifngr1</i> | <i>Tnfrsf1a</i> |
| <i>Ifngr1</i> KO                   | 90.5%         | NA              |
| <i>Tnfrsf1a</i> KO                 | NA            | 90.1%           |
| <i>Ifngr1</i> / <i>Tnfrsf1a</i> KO | 90.5%         | 90.2%           |

**Supplementary Fig. S3. Generation of tumor cell lines with multiple gene edits.**

(A) TIDE analysis of *Rnf31* gene editing efficiency in B16 *B2m*<sup>-/-</sup> *Rnf31*-KO cells (upper panel) and B16 *B2m*<sup>-/-</sup> *Rnf31*/*Atg5*-dKO cells (lower panel).

(B) Western blot analysis for ATG5 with cell lysates from B16 *B2m*<sup>-/-</sup> cells (WT) and B16 *B2m*<sup>-/-</sup> *Atg5*-KO cells. GAPDH is shown as a loading control.

(C) Editing efficiency for a control gRNA analysed by TIDE analysis in B16 *B2m*<sup>-/-</sup> ctrl-KO cells.

(D) Western blot analysis for PIGS with cell lysates from B16 *B2m*<sup>-/-</sup> cells (WT), B16 *B2m*<sup>-/-</sup> *Pigs*-KO cells, B16 *B2m*<sup>-/-</sup> *Rnf31*/*Pigs*-dKO cells, and B16 *B2m*<sup>-/-</sup> *Atg5*/*Pigs*-dKO cells. GAPDH is shown as a loading control.

(E) Summary of editing efficiency of *Rnf31*, *Rnf3*, and *Atg5* genes revealed by TIDE analysis for the indicated cell lines.

(F) Western blot analysis for ATG5 with cell lysates from B16 *B2m*<sup>-/-</sup> cells (WT), B16 *B2m*<sup>-/-</sup> *Atg5*-KO cells, MC38 *B2m*<sup>-/-</sup> cells (WT), MC38 *B2m*<sup>-/-</sup> *Rnf31*/*Atg5*-dKO cells (electroporated once or twice), PY8119 *B2m*<sup>-/-</sup> cells (WT), and PY8119 *B2m*<sup>-/-</sup> *Rnf31*/*Atg5*-dKO cells (electroporated once or twice). GAPDH is shown as a loading control.

(G) Histogram of flow cytometry analysis for H-2K<sup>d</sup>/H-2D<sup>d</sup> expression. Indicated cell lines were treated with or without IFN $\gamma$  (50ng/ml) for 48h.

(H) Summary of editing efficiency of *Ifngr1* and *Tnfrsf1a* genes revealed by TIDE analysis of indicated cell lines. NA, not applicable.
